# Supplementary material for: Patient and Caregiver Experience with Long-Term Home Non-Invasive Ventilation in Kazakhstan: A Qualitative Study
Source: Research Square preprint supplement (doi:10.21203/rs.3.rs-8299150/v1), 2026-01-12
Supplement: Supplementary file 1 [file 6070ed1668474f6bf6c853d7.docx]

**COREQ (COnsolidated criteria for REporting Qualitative research) Checklist**

**Domain 1: Research team and reflexivity**

| **No** | **Item** | **Guide questions/Description** | **Reported in Manuscript (Answer)** |
| --- | --- | --- | --- |
| **Personal Characteristics** |  |  |  |
| 1 | Interviewer/facilitator | Which author/s conducted the interview or focus group? | The interviews were conducted by [A.S], a female pulmonologist. *(See Methods)* |
| 2 | Credentials | What were the researcher's credentials? | MD, Master of Medicine. *(See Methods)* |
| 3 | Occupation | What was their occupation at the time of the study? | Pulmonologist, researcher. *(See Methods)* |
| 4 | Gender | Was the researcher male or female? | Female. *(See Methods)* |
| 5 | Experience and training | What experience or training did the researcher have? | 8 years of experience in respiratory support; trained in qualitative interviewing techniques. *(See Methods)* |
| **Relationship with participants** |  |  |  |
| 6 | Relationship established | Was a relationship established prior to study commencement? | The interviewer introduced herself as a researcher. For some patients, she was part of the specialized medical team, but not their primary local physician. |
| 7 | Participant knowledge of the interviewer | What did the participants know about the researcher? | Participants knew the interviewer was a specialist in respiratory support conducting research to improve care quality. |
| 8 | Interviewer characteristics | What characteristics were reported about the interviewer/facilitator? | Interest in patient experience with home NIV; specialized medical background. |

**Domain 2: Study design**

| **No** | **Item** | **Guide questions/Description** | **Reported in Manuscript (Answer)** |
| --- | --- | --- | --- |
| **Theoretical framework** |  |  |  |
| 9 | Methodological orientation | What methodological orientation was stated to underpin the study? | Phenomenological qualitative study. *(See Methods)* |
| **Participant selection** |  |  |  |
| 10 | Sampling | How were participants selected? | Purposive sampling (patients with CRF on long-term NIV). |
| 11 | Method of approach | How were participants approached? | Approached via telephone by the researcher. |
| 12 | Sample size | How many participants were in the study? | 21 participants (patients and caregivers). *(See Results/Table 1)* |
| 13 | Non-participation | How many people refused to participate or dropped out? Reasons? | None reported (or specify if any refused). |
| **Setting** |  |  |  |
| 14 | Setting of data collection | Where was the data collected? | Telephone interviews (participants were at home). |
| 15 | Presence of non-participants | Was anyone else present? | In some cases (n=5), caregivers/relatives were present to assist patients with severe dyspnea. |
| 16 | Description of sample | What are the important characteristics of the sample? | Patients from diverse regions of Kazakhstan, mean age 47, various etiologies of CRF. *(See Table 1)* |
| **Data collection** |  |  |  |
| 17 | Interview guide | Were questions, prompts, guides provided by the authors? | Yes, a semi-structured interview guide was used based on literature (e.g., Caneiras et al.). |
| 18 | Repeat interviews | Were repeat interviews carried out? | No, single interviews were conducted. |
| 19 | Audio/visual recording | Did the research use audio or visual recording to collect the data? | Audio recording of telephone calls. |
| 20 | Field notes | Were field notes made during and/or after the interview? | Yes, notes were taken during interviews. |
| 21 | Duration | What was the duration of the interviews? | Average 45 minutes (range 41–49 min). |
| 22 | Data saturation | Was data saturation discussed? | Yes, recruitment continued until no new themes emerged. |
| 23 | Transcripts returned | Were transcripts returned to participants for comment? | No, but preliminary findings were discussed with a subset of patients. |

**Domain 3: Analysis and findings**

| **No** | **Item** | **Guide questions/Description** | **Reported in Manuscript (Answer)** |
| --- | --- | --- | --- |
| **Data analysis** |  |  |  |
| 24 | Number of data coders | How many data coders coded the data? | Two independent researchers (A.S and O.T) *(See Methods)* |
| 25 | Description of the coding tree | Did authors provide a description of the coding tree? | Yes, 5 main categories and sub-themes were identified. *(See Table 2)* |
| 26 | Derivation of themes | Were themes identified in advance or derived from the data? | Themes were derived inductively from the data (Inductive approach). |
| 27 | Software | What software, if applicable, was used? | NVivo 12 Plus. |
| 28 | Participant checking | Did participants provide feedback on the findings? | Preliminary results were presented to two patients for validation. *(See Methods)* |
| **Reporting** |  |  |  |
| 29 | Quotations presented | Were participant quotations presented to illustrate the themes? | Yes, extensive quotations are provided in the Results section. |
| 30 | Data and findings consistent | Was there consistency between the data presented and the findings? | Yes, quantitative data (EQ-5D) supports qualitative findings. |
| 31 | Clarity of major themes | Were major themes clearly presented in the findings? | Yes, 5 major categories are clearly defined. |
| 32 | Clarity of minor themes | Is there a description of diverse cases or minor themes? | Yes, differences between regional and capital city experiences are highlighted. |
